# Supplementary material for: A functional IFN-λ4-generating DNA polymorphism could protect older asthmatic women from aeroallergen sensitization and associate with clinical features of asthma
Source: PubMed Central journal article supplement (PMC5585370; doi:10.1038/s41598-017-10467-y), 2017-09-05

# **A functional IFN- $\lambda$ 4-generating DNA polymorphism could protect older asthmatic women from aeroallergen sensitization and associate with clinical features of asthma**

Sreedhar Chinnaswamy<sup>1, 7\*</sup>, Aleksandra Wardzynska<sup>2</sup>, Malgorzata Pawelczyk<sup>2</sup>, Joanna Makowska<sup>2, 3</sup>, Tea Skaaby<sup>4</sup>, Josep M. Mercader<sup>5</sup>, Tarunveer S. Ahluwalia<sup>6</sup>, Niels Grarup<sup>11</sup>, Marta Guindo-Martinez<sup>5</sup>, Hans Bisgaard<sup>6</sup>, David Torrents<sup>5, 10</sup>, Allan Linneberg<sup>4,8,9</sup>, Klaus Bønnelykke<sup>6</sup>, Marek L. Kowalski<sup>2, 7</sup>

Suppl. Fig. 1: Fixed-effect meta-analysis

A) Association of *IFNL* polymorphisms with atopy in older men

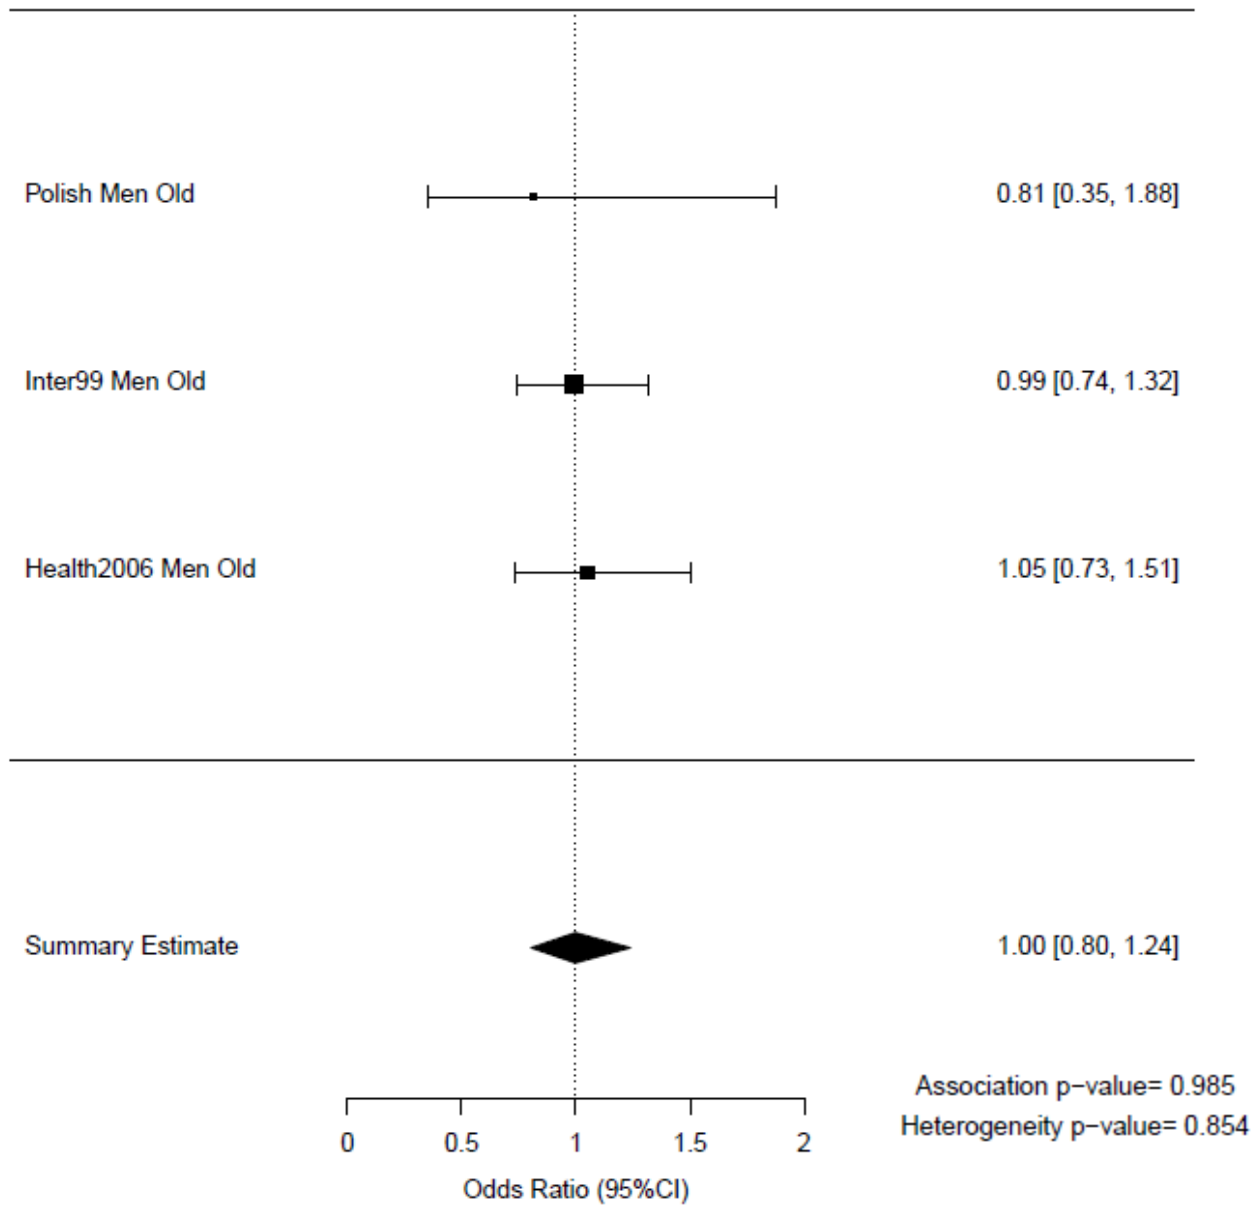

Suppl. Fig. 1: Fixed-effect meta-analysis

B) Association of *IFNL* polymorphisms with atopy in younger men

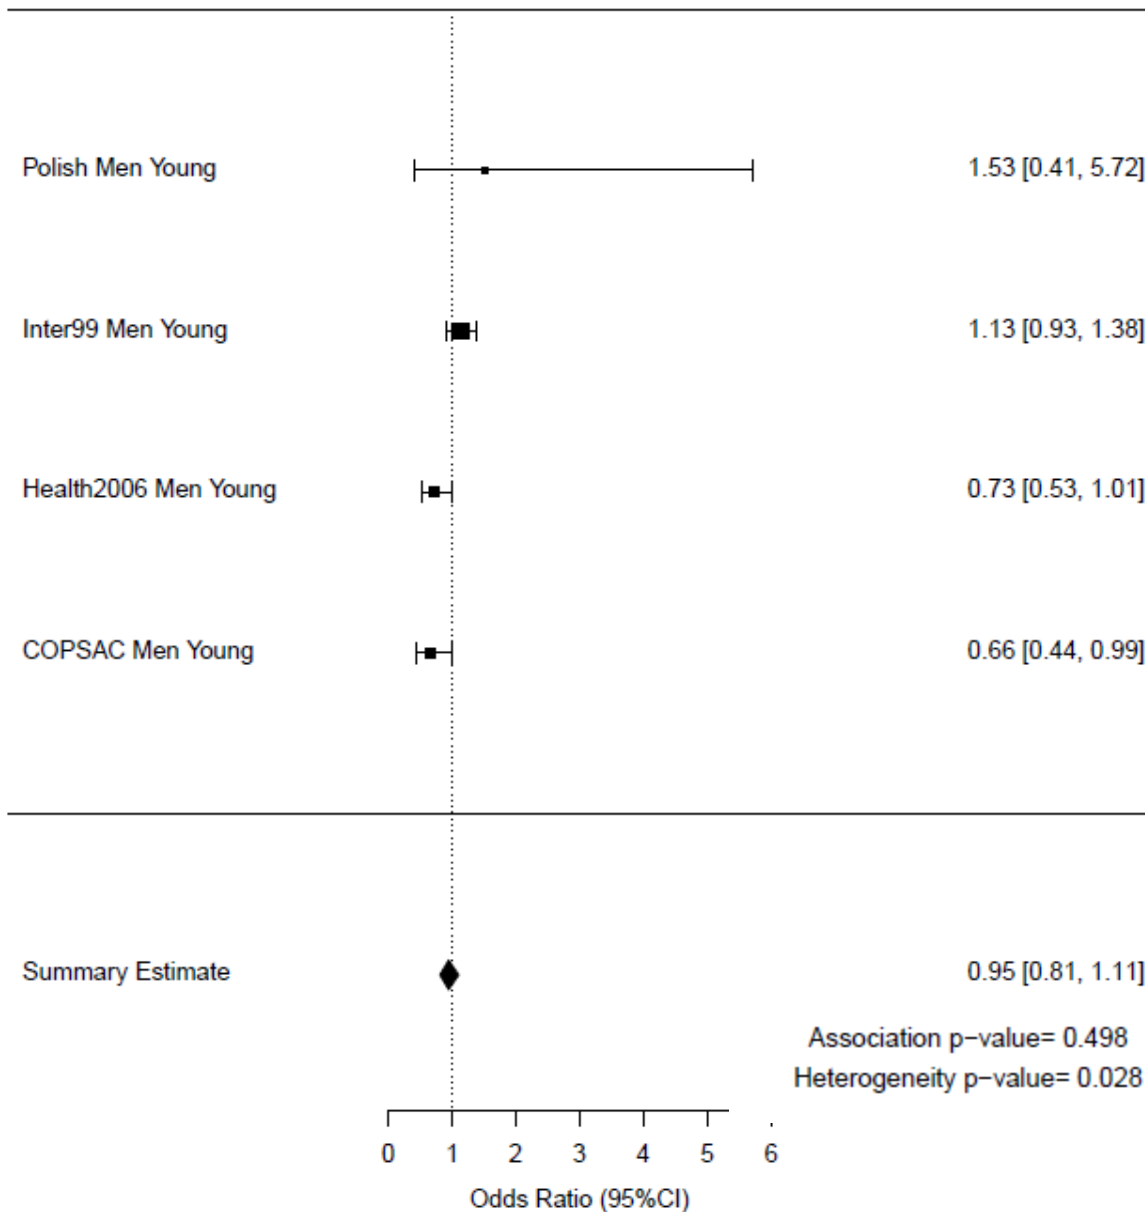

Suppl. Fig. 1: Fixed-effect meta-analysis

C) Association of *IFNL* polymorphisms with atopy in older women

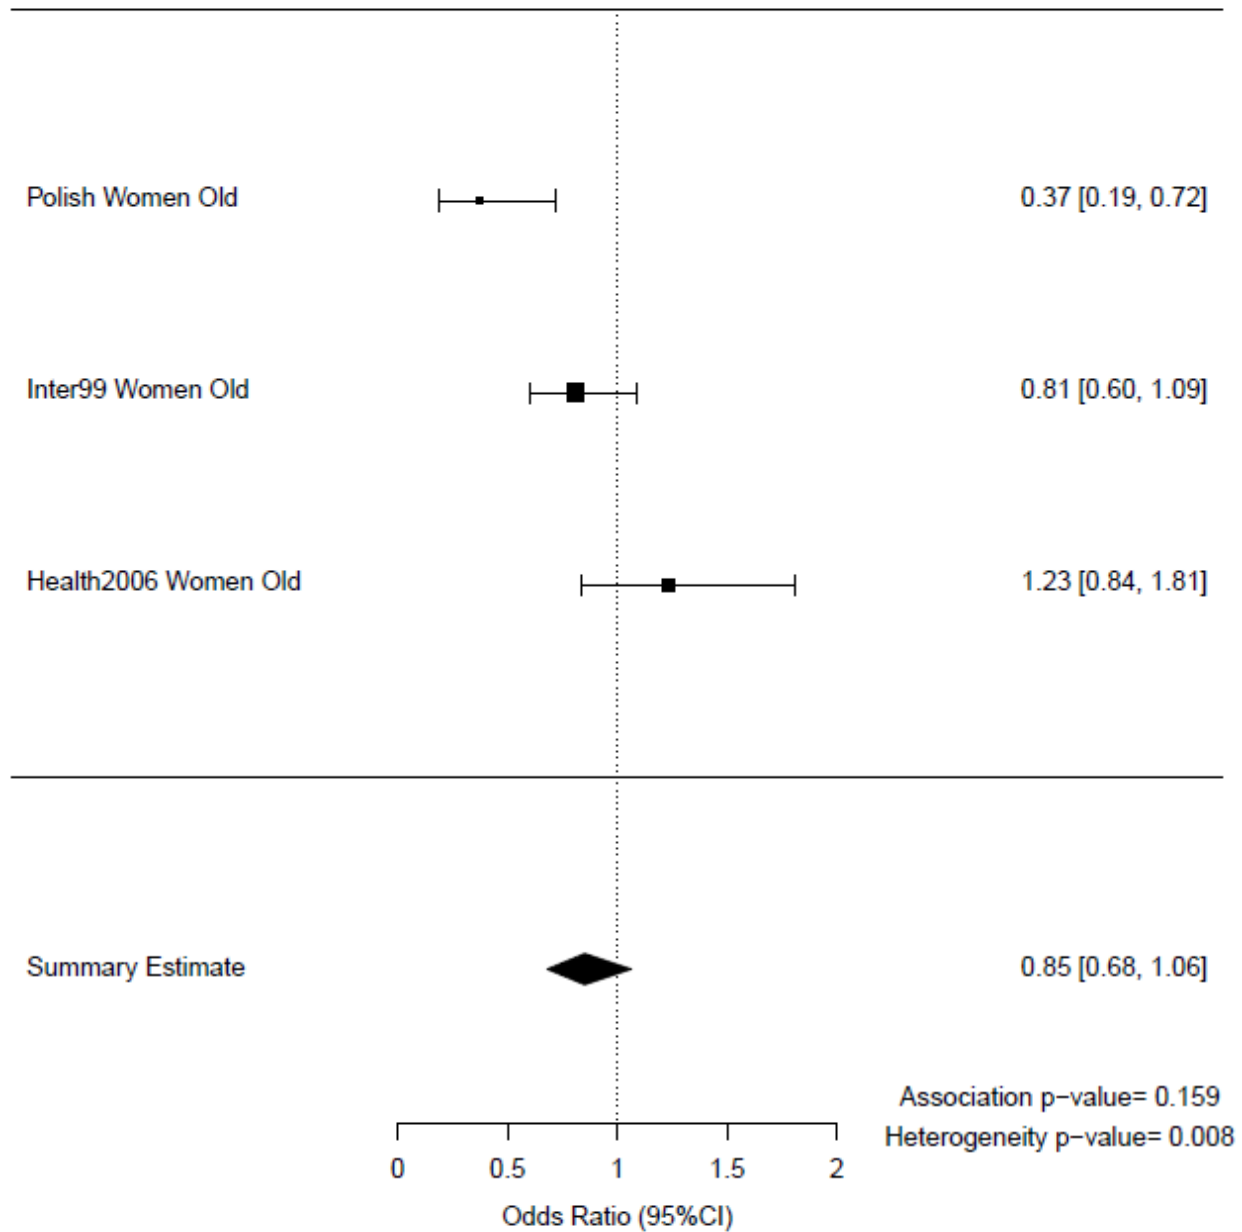

Suppl. Fig. 1: Fixed-effect meta-analysis

D) Association of *IFNL* polymorphisms with atopy in younger women

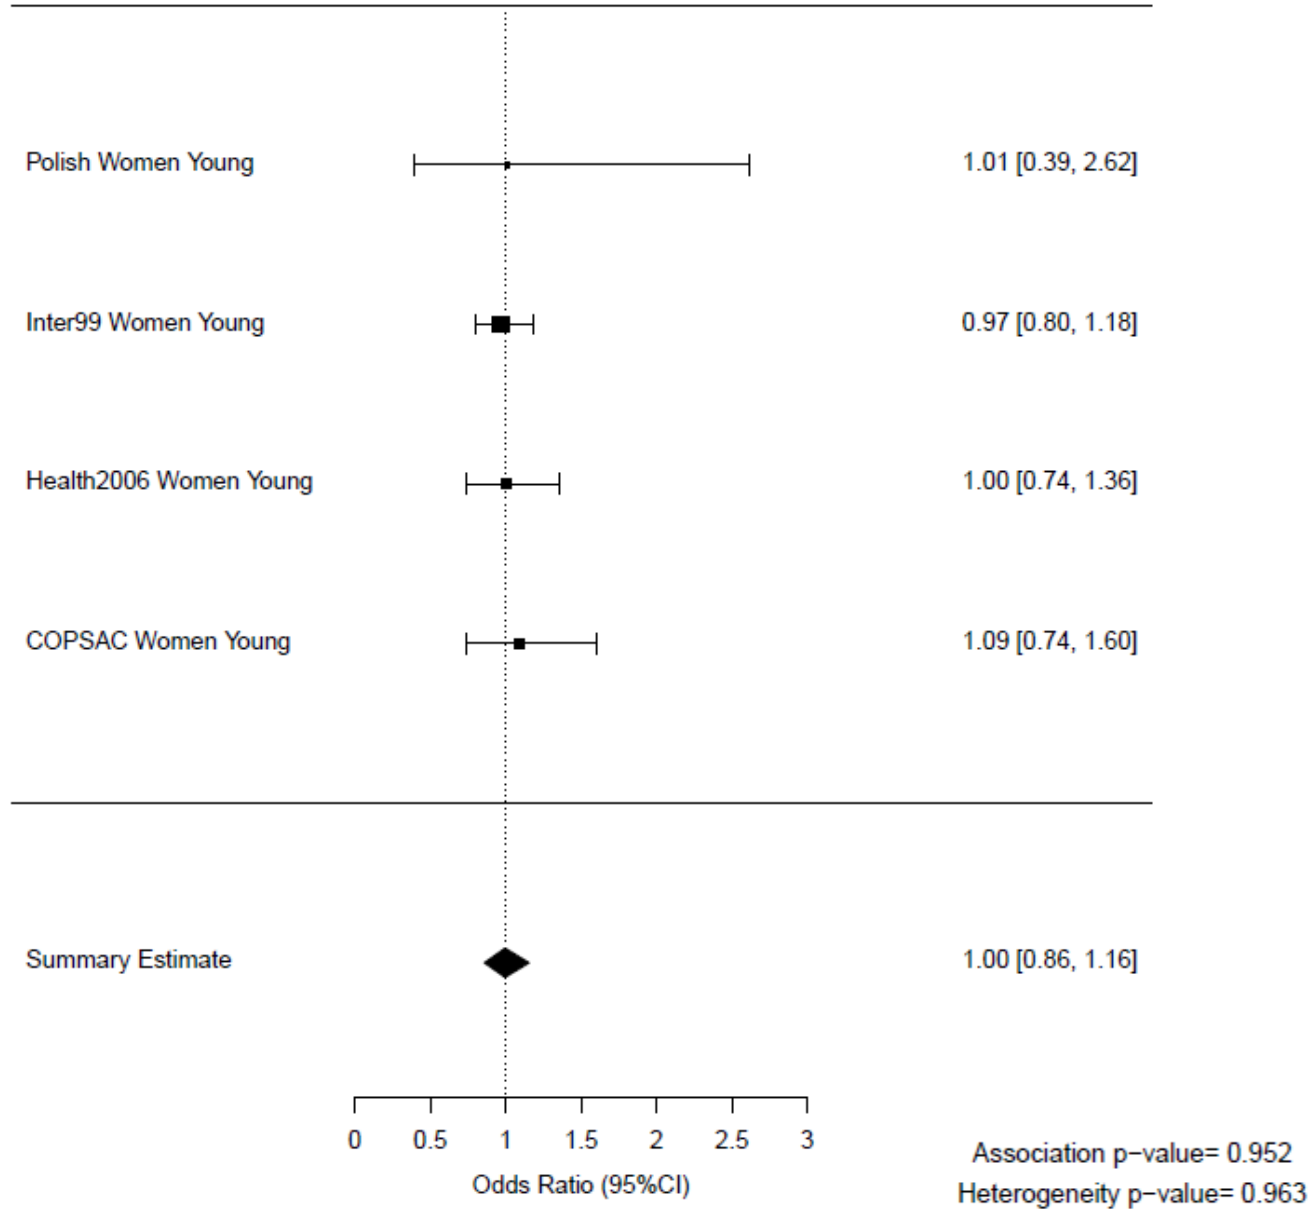

Suppl. Fig. 2: Fixed-effect meta-analysis

A) Association of *IFNL* polymorphisms with asthma in older men

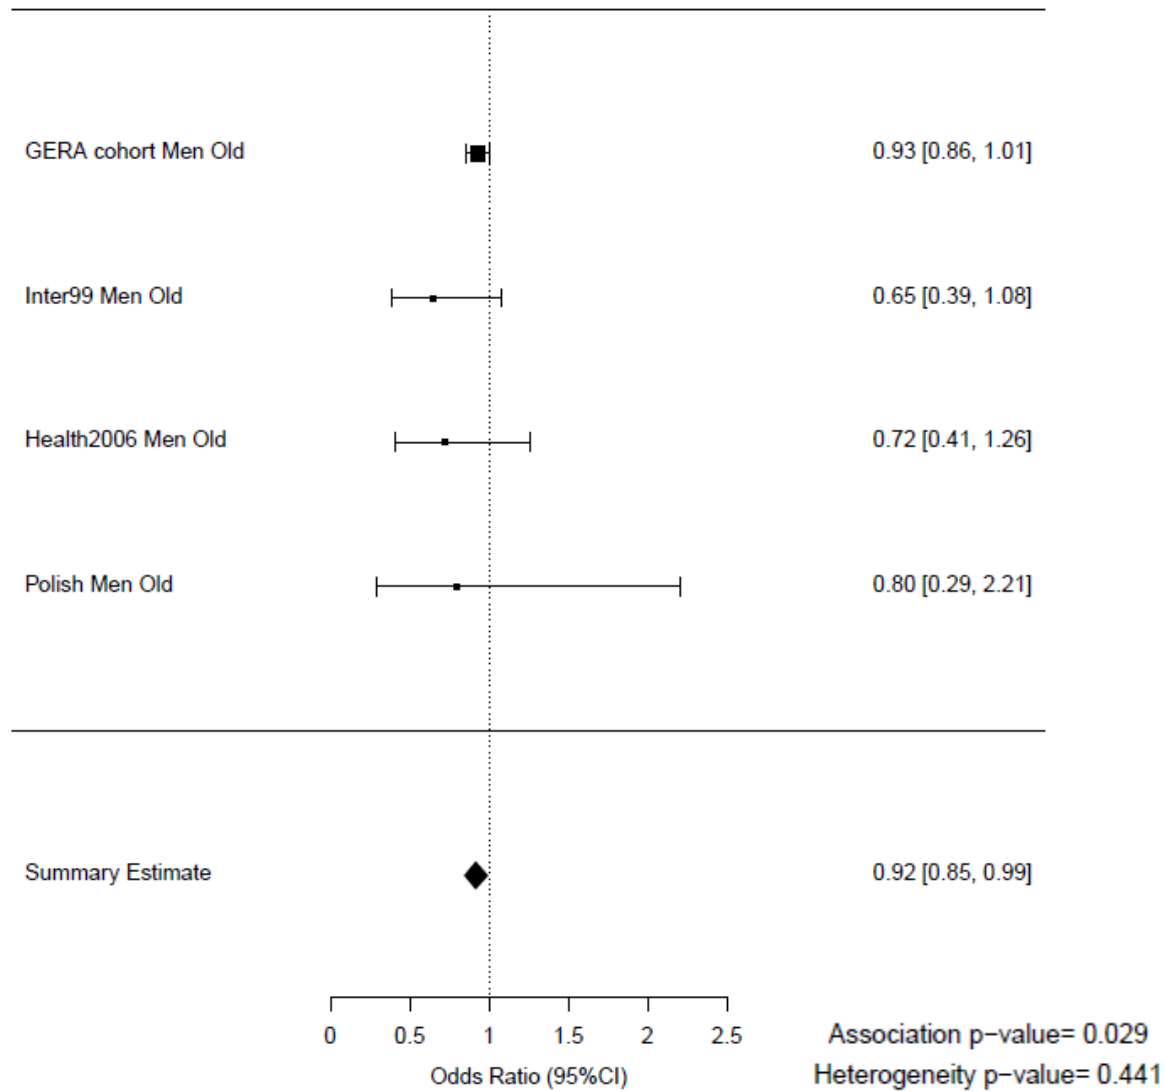

Suppl. Fig. 2: Fixed-effect meta-analysis

B) Association of *IFNL* polymorphisms with asthma in older women

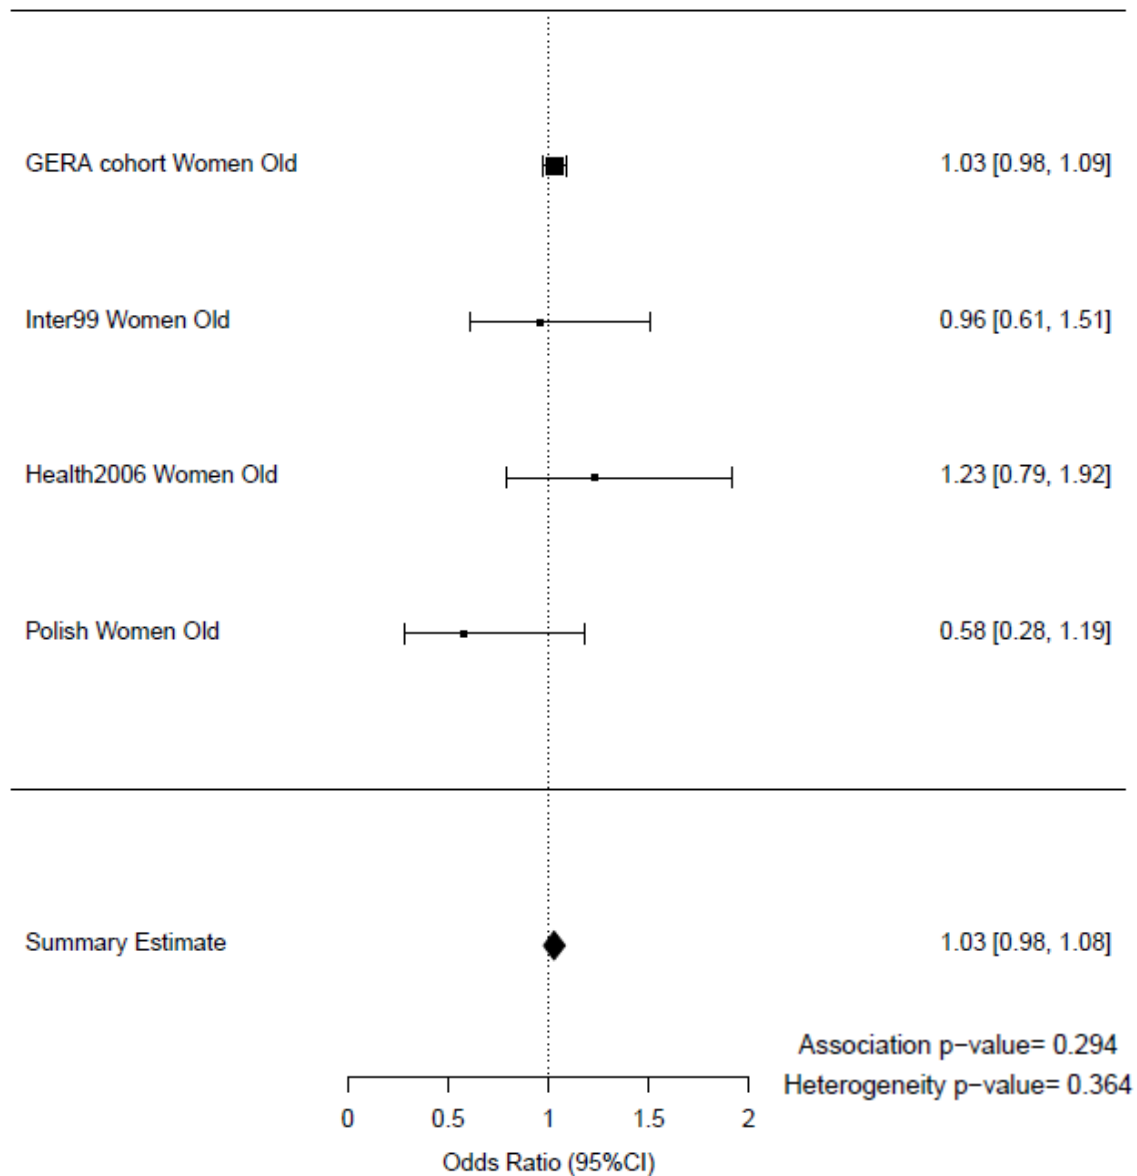

Suppl. Fig. 2: Fixed-effect meta-analysis

C) Association of *IFNL* polymorphisms with asthma in younger men

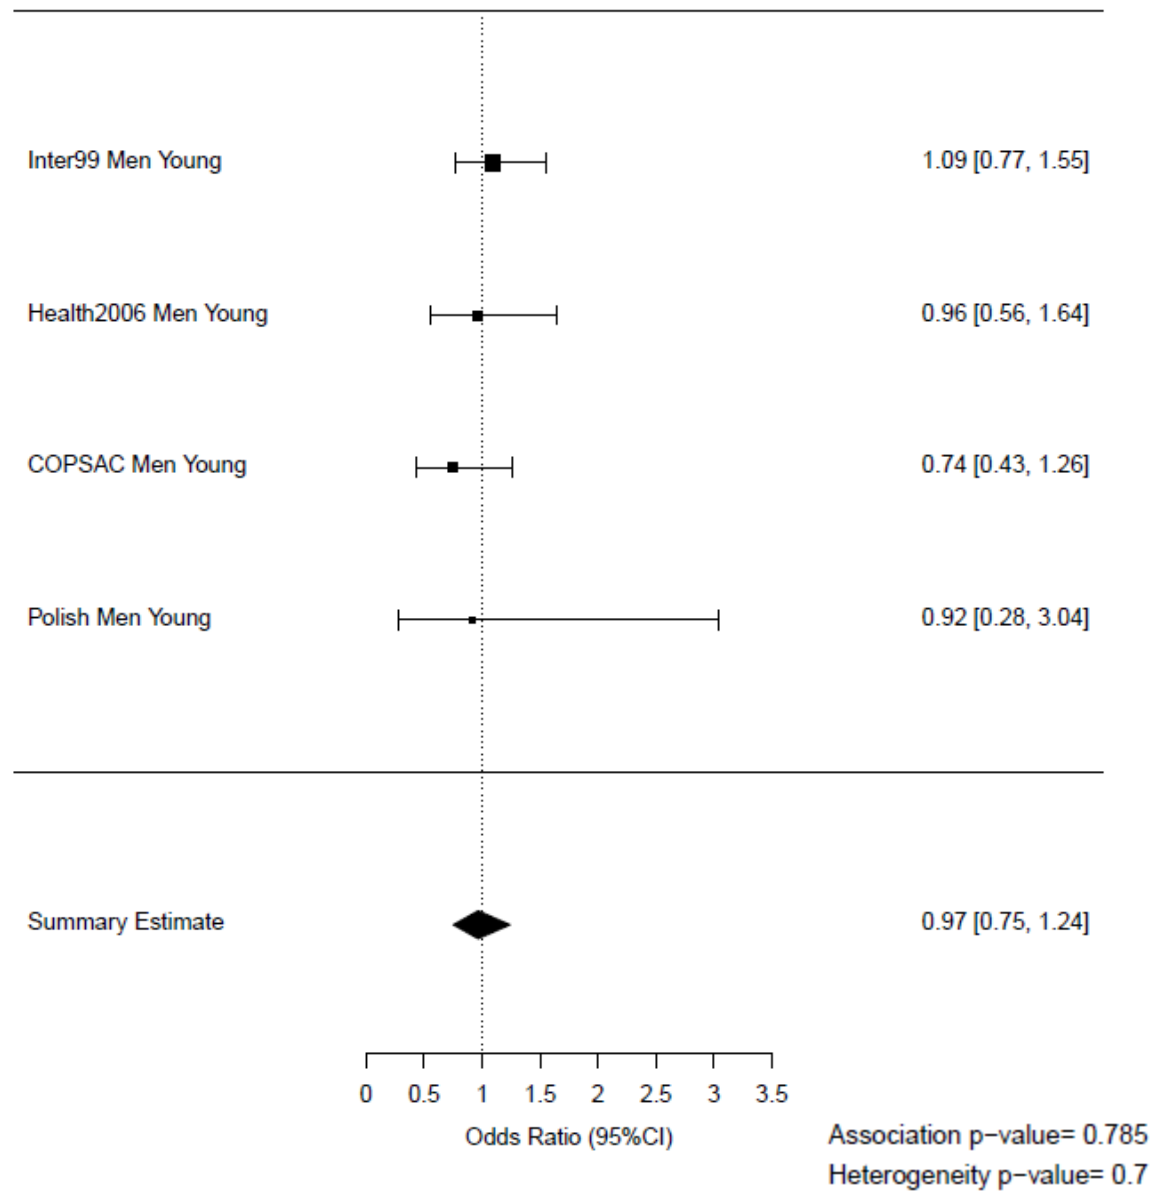



Suppl. Fig. 2: Fixed-effect meta-analysis

D) Association of *IFNL* polymorphisms with asthma in younger women

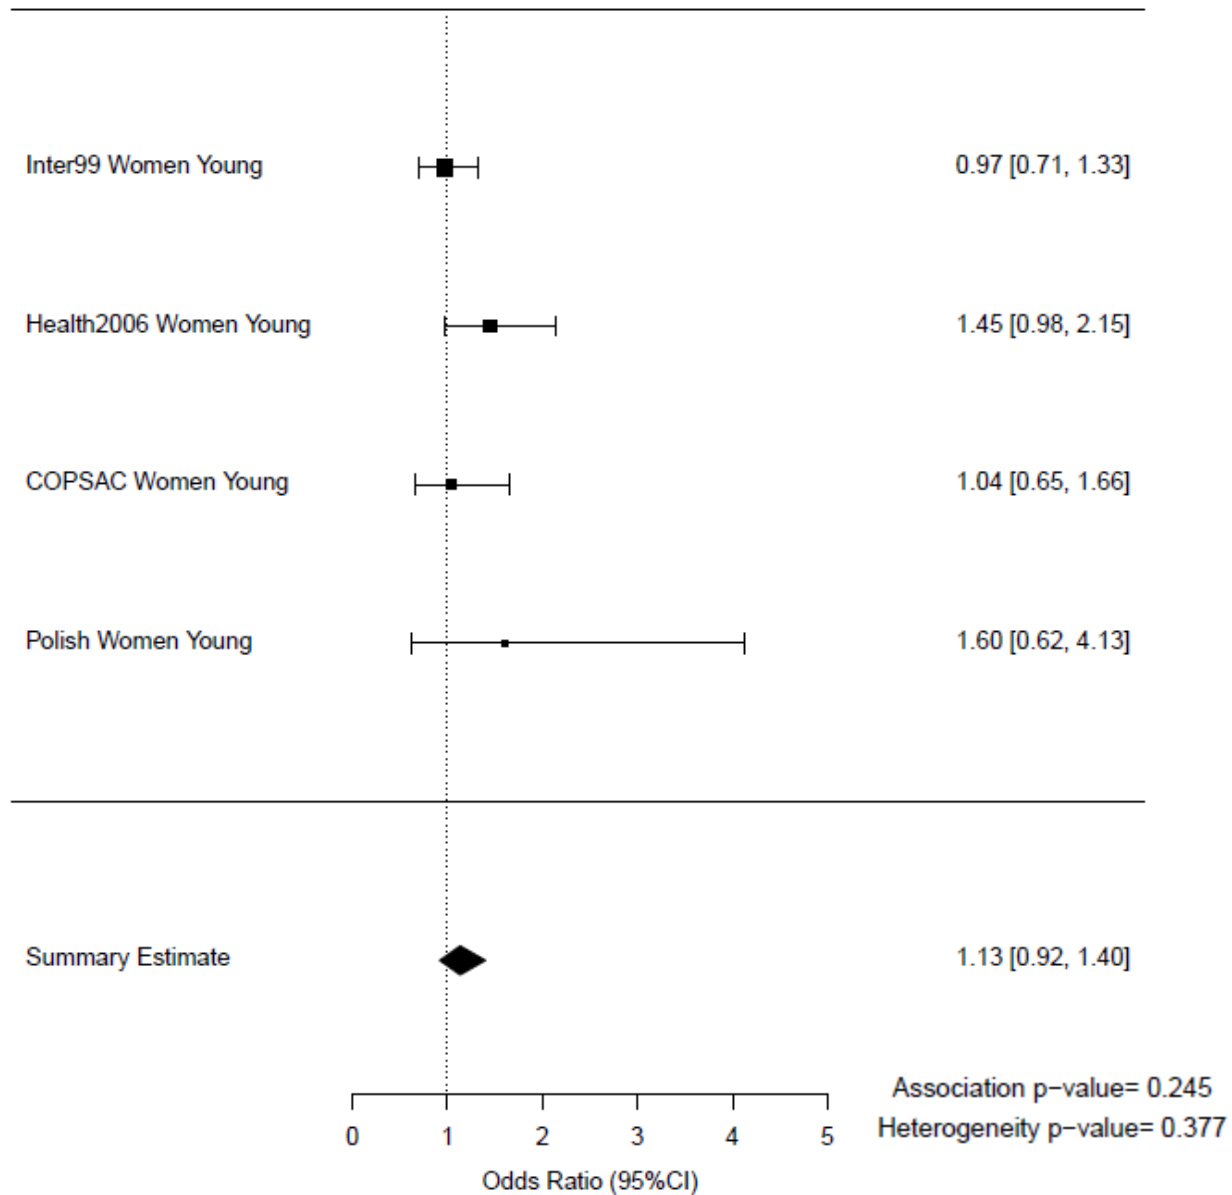

Supplement: 41598_2017_10467_MOESM1_ESM.pdf [file 41598_2017_10467_MOESM1_ESM.pdf]
